# Supplementary material for: Combined Liquid Chromatography–Tandem Mass Spectrometry Analysis of Progesterone Metabolites
Source: PubMed Central journal article supplement (PMC4332660; doi:10.1371/journal.pone.0117984), 2015-02-13

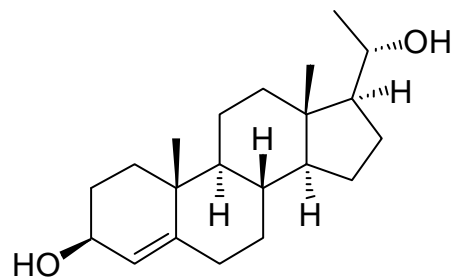

3β,20α-P4

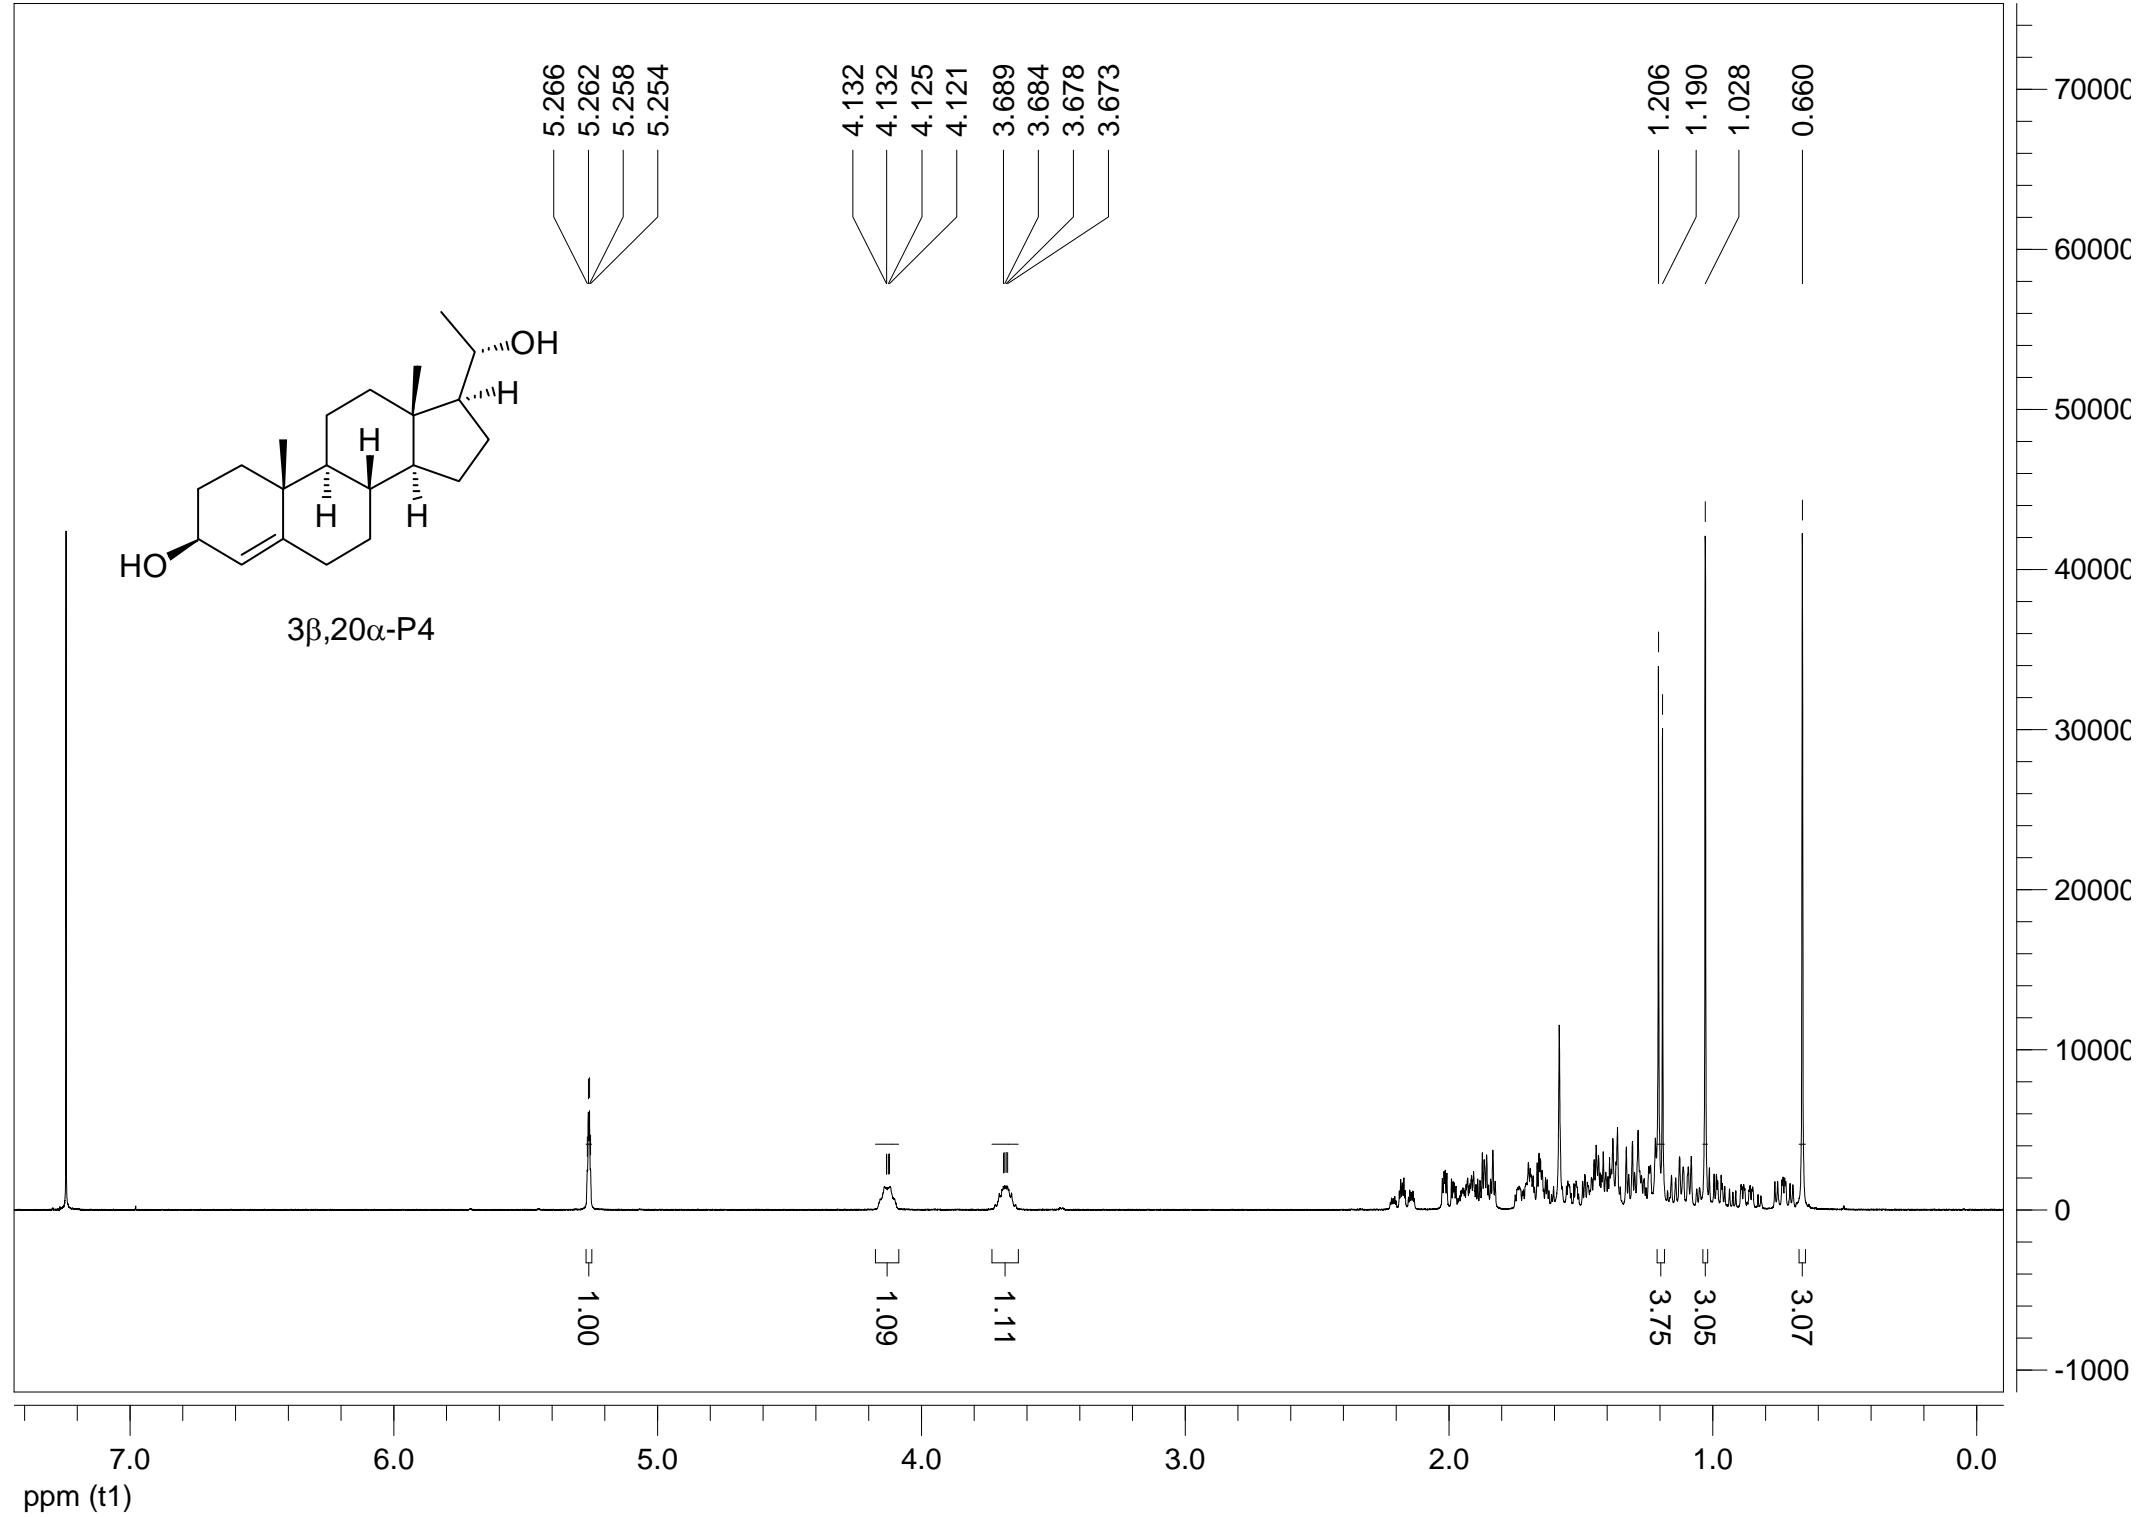

Supplement: pone.0117984.s001.pdf [file pone.0117984.s001.pdf]
