# Supplementary material for: Combined Liquid Chromatography–Tandem Mass Spectrometry Analysis of Progesterone Metabolites
Source: PubMed Central journal article supplement (PMC4332660; doi:10.1371/journal.pone.0117984), 2015-02-13
Supplement: pone.0117984.s003.pdf [file pone.0117984.s003.pdf]

Sample Name: peak 1

```

=====
Acq. Operator   : Jozko                               Seq. Line :    2
Acq. Instrument : HPLC                               Location  : Vial 2
Injection Date  : 1/18/2013 3:08:56 PM              Inj       :    1
                                                    Inj Volume: 10 µl

Acq. Method     : C:\Chem32\1\DATA\JC_SI_P4\JC_SI_P4 2013-01-18 14-53-00\JC_SI_P4_MECN.M
Last changed    : 1/17/2013 6:29:42 PM by Jozko
Analysis Method  : C:\CHEM32\1\DATA\JC_SI_P4\JC_SI_P4 2013-01-18 14-53-00\002-0201.D\DA.M (JC_
SI_P4_MECN.M)
Last changed    : 1/17/2013 6:29:42 PM by Jozko
Method Info     : Analiza derivatov po redukciji progesterona
                  Voda / MeCN = 45 /55
                  Kolona: Agilent Eclipse Plus C16 150 x 4.6 mm, 5 µm
                  pretok 1.2 ml/min, 25 °C, V = 10 µl, 206 nm + 240 nm, 12 min

```

Sample Info : P4-3beta, 20alpha

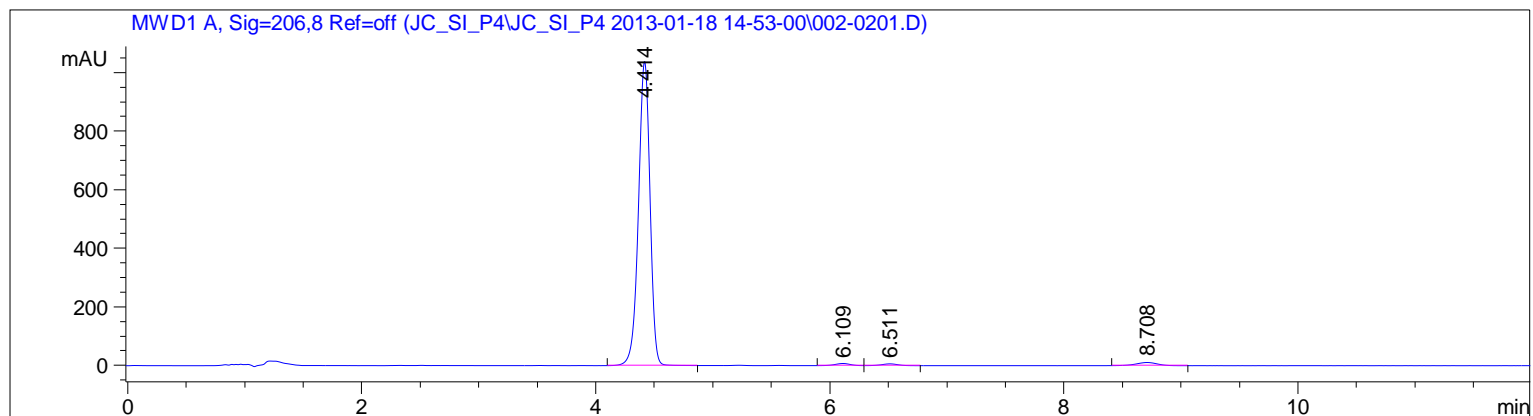

```

=====
                          Area Percent Report
=====

```

```

Sorted By           :      Signal
Multiplier          :      1.0000
Dilution            :      1.0000
Do not use Multiplier & Dilution Factor with ISTDs

```

Signal 1: MWD1 A, Sig=206,8 Ref=off

| Peak # | RetTime [min] | Type | Width [min] | Area [mAU*s] | Height [mAU] | Area %  |
|--------|---------------|------|-------------|--------------|--------------|---------|
| 1      | 4.414         | BB   | 0.1060      | 7115.73145   | 1038.00623   | 96.4377 |
| 2      | 6.109         | BV   | 0.1421      | 66.88280     | 7.35368      | 0.9064  |
| 3      | 6.511         | VB   | 0.1484      | 58.62856     | 6.08552      | 0.7946  |
| 4      | 8.708         | BB   | 0.1980      | 137.33667    | 10.82822     | 1.8613  |

```
Totals :                      7378.57948 1062.27365
```

```

=====
*** End of Report ***

```
