# Supplementary material for: Combined Liquid Chromatography–Tandem Mass Spectrometry Analysis of Progesterone Metabolites
Source: PubMed Central journal article supplement (PMC4332660; doi:10.1371/journal.pone.0117984), 2015-02-13
Supplement: pone.0117984.s004.pdf [file pone.0117984.s004.pdf]

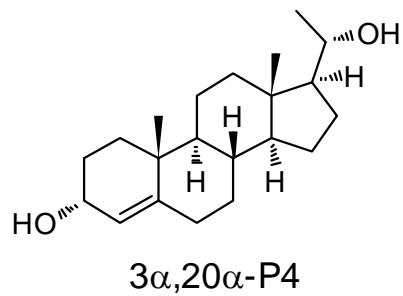

5.474  
5.470  
5.462  
5.457

4.079  
4.073  
4.068  
3.722  
3.707  
3.688

1.232  
1.217  
0.984  
0.690

1.00

1.04

1.11

3.49

3.00

3.00

10000

50000

0

ppm (t1)

7.0

6.0

5.0

4.0

3.0

2.0

1.0

0.0
