# Supplementary material for: Combined Liquid Chromatography–Tandem Mass Spectrometry Analysis of Progesterone Metabolites
Source: PubMed Central journal article supplement (PMC4332660; doi:10.1371/journal.pone.0117984), 2015-02-13
Supplement: pone.0117984.s005.pdf [file pone.0117984.s005.pdf]

# Single Mass Analysis

Tolerance = 10.0 PPM / DBE: min = -1.5, max = 50.0

Element prediction: Off

Number of isotope peaks used for i-FIT = 3

Monoisotopic Mass, Even Electron Ions

682 formula(e) evaluated with 3 results within limits (all results (up to 1000) for each mass)

Elements Used:

C: 0-100 H: 0-100 N: 0-20 O: 0-20

JC\_SI-P4 3 $\alpha$  20 $\alpha$  14 (0.645) Cm (13:18)

1: TOF MS ES+

1.09e+005

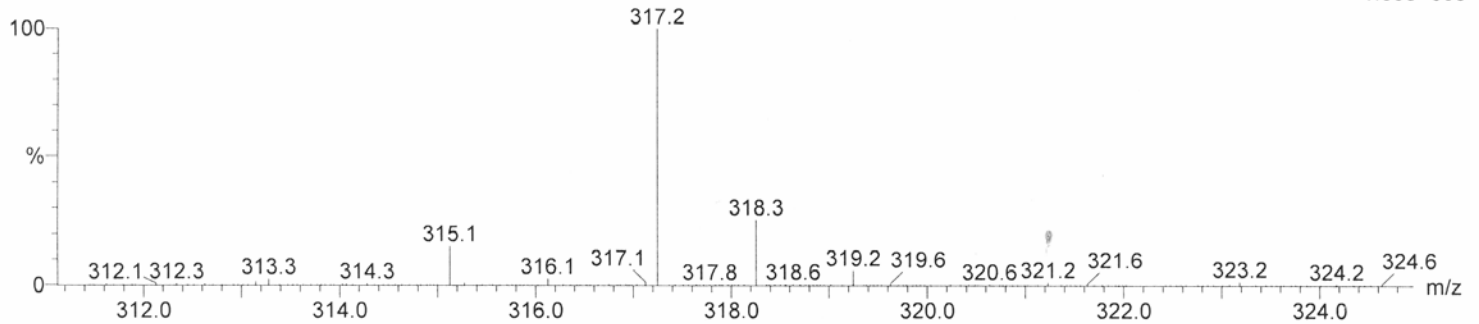

Minimum: -1.5  
Maximum: 5.0 10.0 50.0

| Mass     | Calc. Mass | mDa | PPM | DBE  | i-FIT | i-FIT (Norm) | Formula       |
|----------|------------|-----|-----|------|-------|--------------|---------------|
| 317.2488 | 317.2481   | 0.7 | 2.2 | 5.5  | 346.3 | 0.0          | C21 H33 O2    |
|          | 317.2486   | 0.2 | 0.6 | -1.5 | 350.3 | 4.1          | C6 H29 N12 O3 |
|          | 317.2459   | 2.9 | 9.1 | -0.5 | 351.2 | 4.9          | C2 H25 N18 O  |

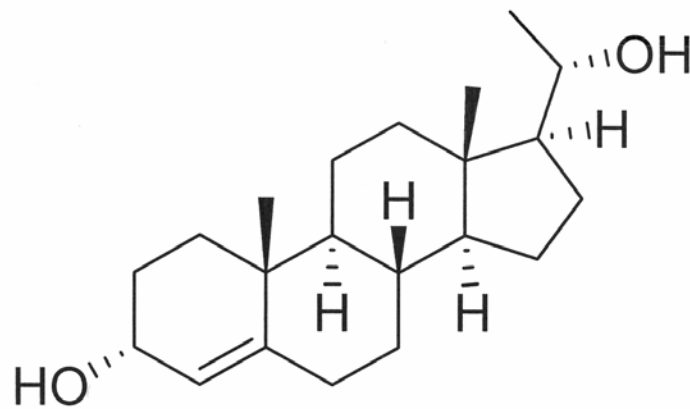

3 $\alpha$ ,20 $\alpha$ -P4
