# Supplementary material for: Combined Liquid Chromatography–Tandem Mass Spectrometry Analysis of Progesterone Metabolites
Source: PubMed Central journal article supplement (PMC4332660; doi:10.1371/journal.pone.0117984), 2015-02-13
Supplement: pone.0117984.s007.pdf [file pone.0117984.s007.pdf]

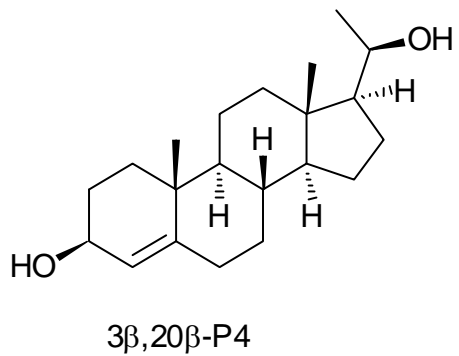

5.250  
5.246

4.133  
4.118  
4.100  
3.715  
3.701  
3.692  
3.677

1.109  
1.094  
1.025  
0.740

10000

50000

0

1.00

1.02

1.12

3.26  
3.05

3.12

ppm (t1)

7.0

6.0

5.0

4.0

3.0

2.0

1.0

0.0
