# Supplementary material for: Combined Liquid Chromatography–Tandem Mass Spectrometry Analysis of Progesterone Metabolites
Source: PubMed Central journal article supplement (PMC4332660; doi:10.1371/journal.pone.0117984), 2015-02-13
Supplement: pone.0117984.s009.pdf [file pone.0117984.s009.pdf]

Sample Name: peak 3

```

=====
Acq. Operator   : Jozko                               Seq. Line :    4
Acq. Instrument : HPLC                               Location  : Vial 4
Injection Date  : 1/18/2013 3:37:08 PM                Inj       :    1
                                                    Inj Volume: 10 µl

Acq. Method     : C:\Chem32\1\DATA\JC_SI_P4\JC_SI_P4 2013-01-18 14-53-00\JC_SI_P4_MECN.M
Last changed    : 1/17/2013 6:29:42 PM by Jozko
Analysis Method : C:\CHEM32\1\DATA\JC_SI_P4\JC_SI_P4 2013-01-18 14-53-00\004-0401.D\DA.M (JC_
SI_P4_MECN.M)
Last changed    : 1/17/2013 6:29:42 PM by Jozko
Method Info     : Analiza derivatov po redukciji progesterona
                  Voda / MeCN = 45 /55
                  Kolona: Agilent Eclipse Plus C16 150 x 4.6 mm, 5 µm
                  pretok 1.2 ml/min, 25 °C, V = 10 µl, 206 nm + 240 nm, 12 min

Sample Info     : P4-3beta, 20beta
    
```

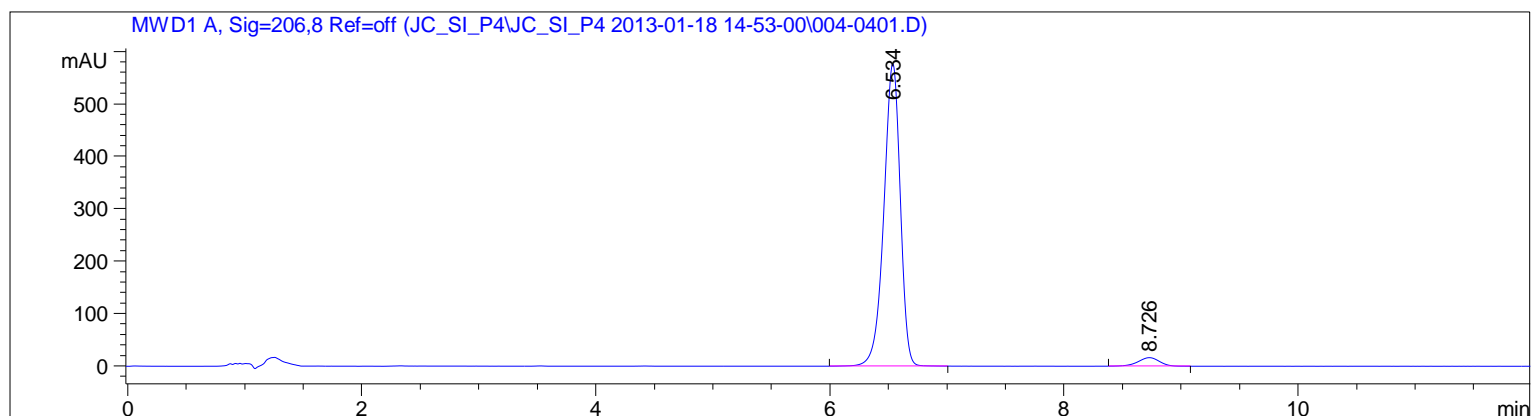

Area Percent Report

```

Sorted By      :      Signal
Multiplier     :      1.0000
Dilution       :      1.0000
Do not use Multiplier & Dilution Factor with ISTDs
    
```

Signal 1: MWD1 A, Sig=206,8 Ref=off

| Peak # | RetTime [min] | Type | Width [min] | Area [mAU*s] | Height [mAU] | Area %  |
|--------|---------------|------|-------------|--------------|--------------|---------|
| 1      | 6.534         | BB   | 0.1517      | 5622.65771   | 576.86383    | 96.4201 |
| 2      | 8.726         | BB   | 0.2014      | 208.75832    | 16.30374     | 3.5799  |

Totals : 5831.41603 593.16757

\*\*\* End of Report \*\*\*
