# Supplementary material for: Combined Liquid Chromatography–Tandem Mass Spectrometry Analysis of Progesterone Metabolites
Source: PubMed Central journal article supplement (PMC4332660; doi:10.1371/journal.pone.0117984), 2015-02-13

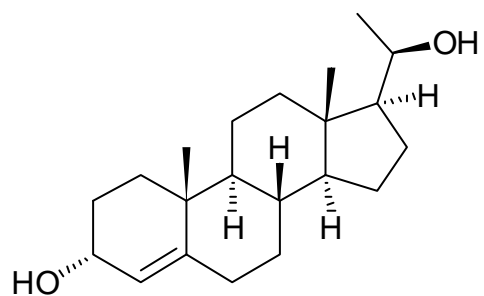

3 $\alpha$ ,20 $\beta$ -P4

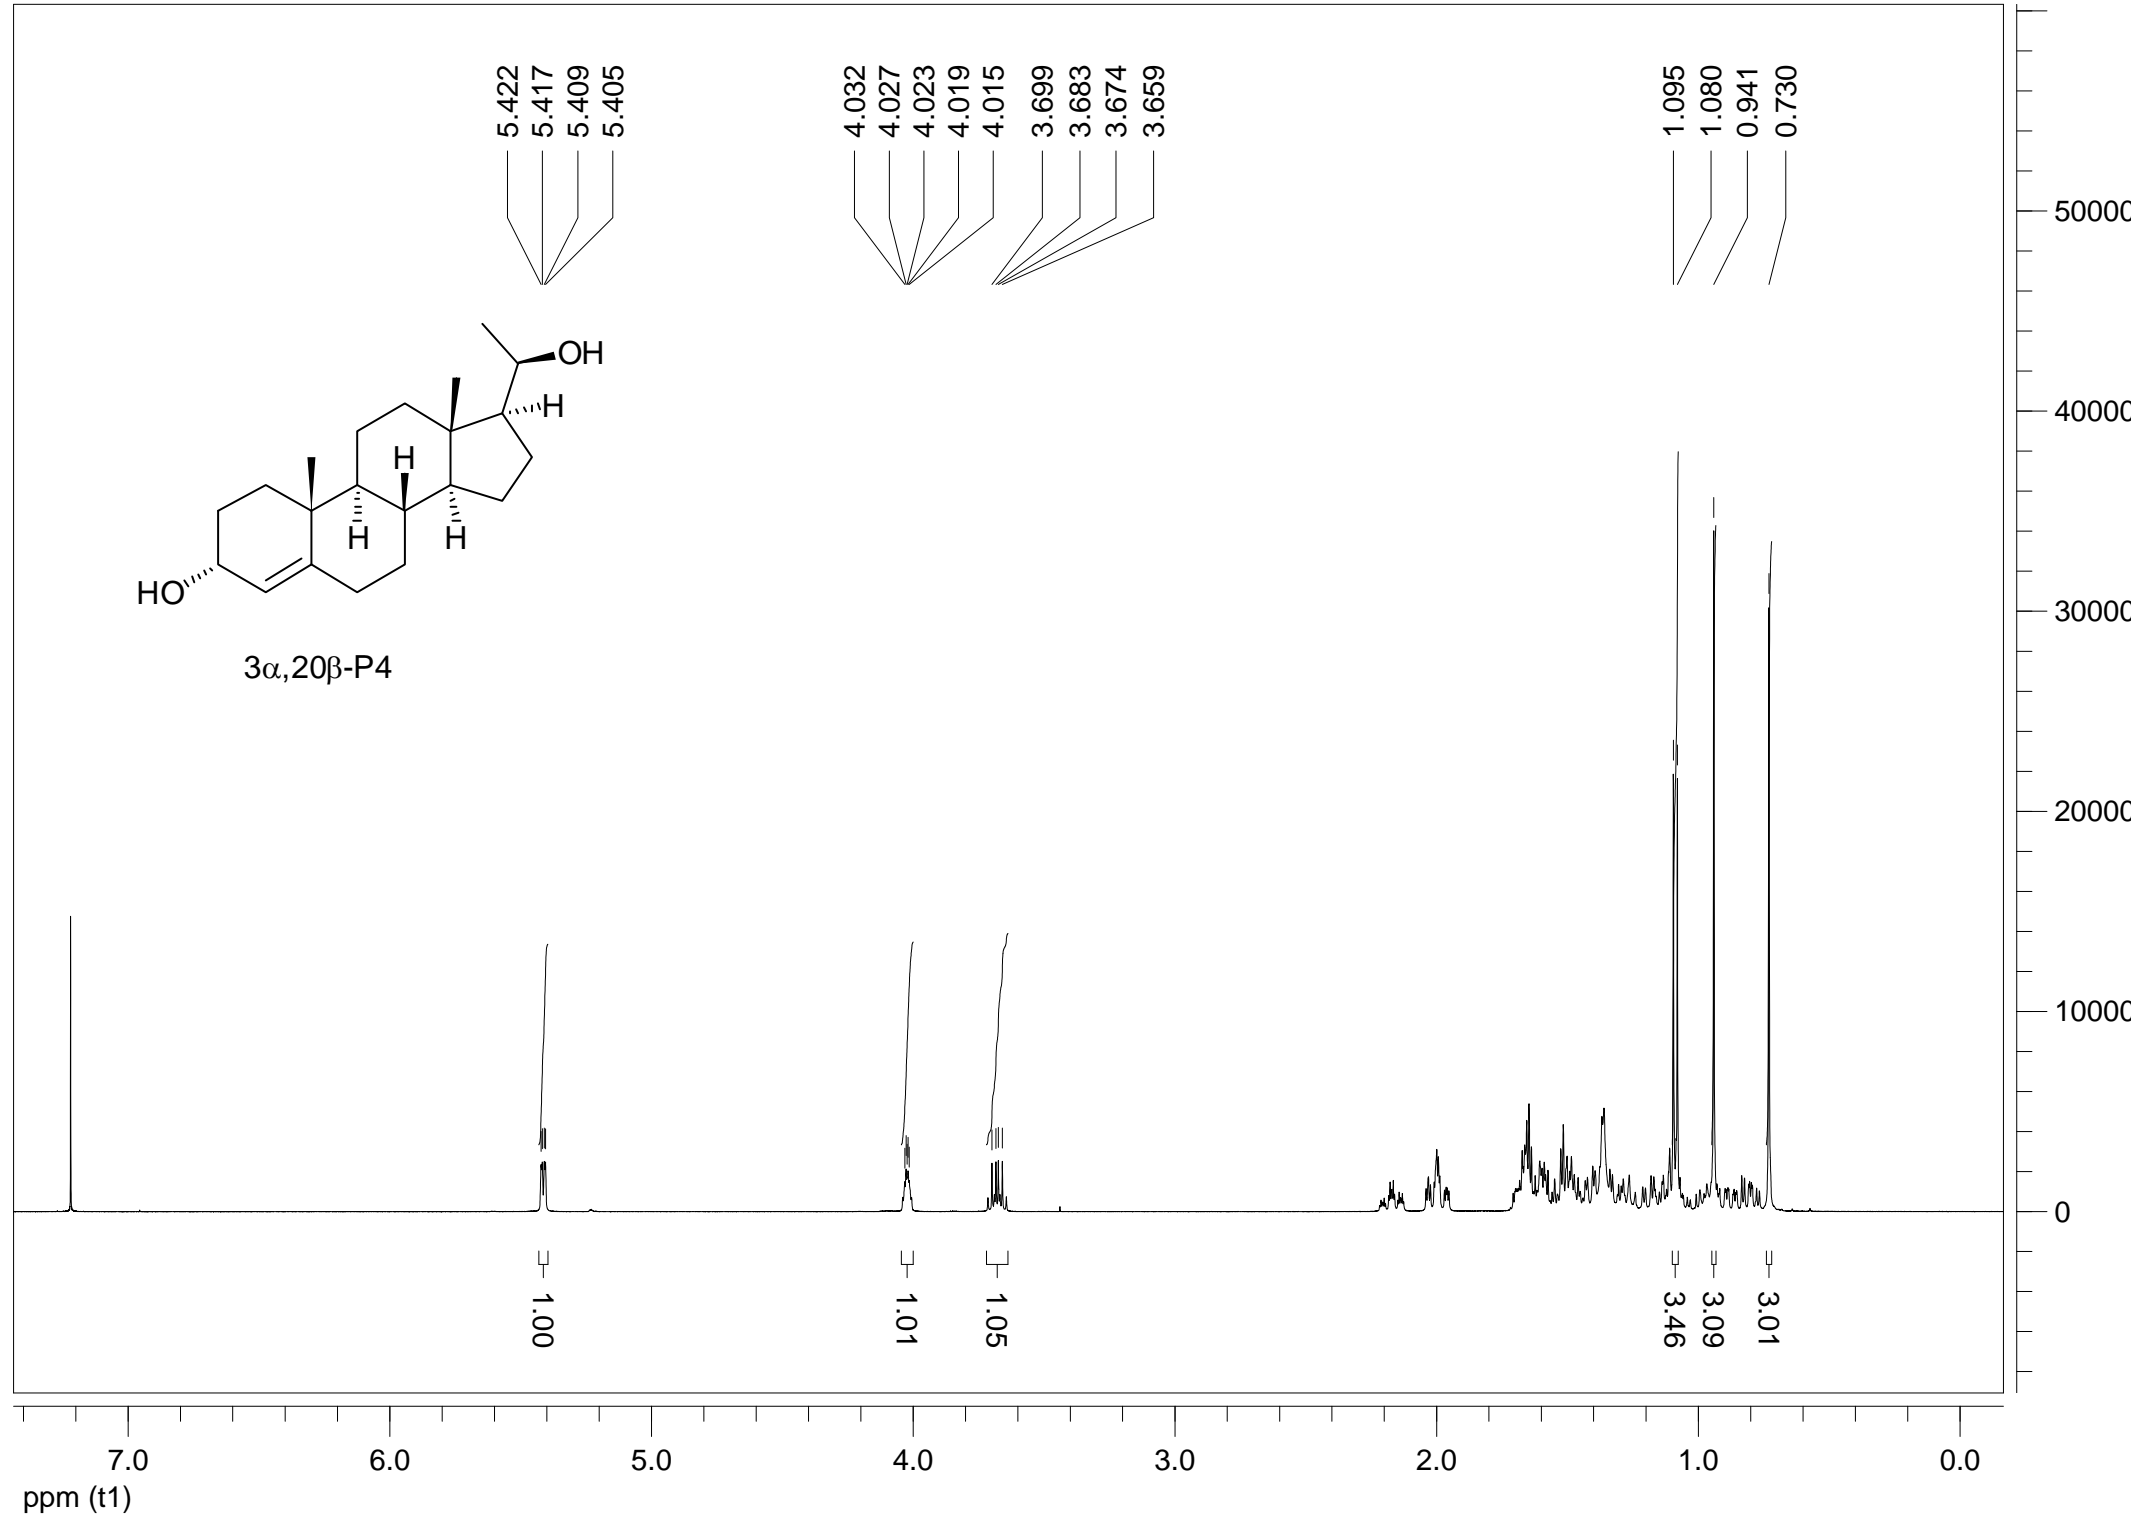

Supplement: pone.0117984.s010.pdf [file pone.0117984.s010.pdf]
